# Supplementary material for: Solketal production in a solvent-free continuous flow process: scaling from laboratory to bench size
Source: Royal Society of Chemistry journal article supplement (doi:10.1039/c9re00083f), 2019-01-01
Supplement: c9re00083f1.pdf [file c9re00083f1.pdf]

## Solketal production in a solvent-free continuous flow process: scaling from laboratory to bench size

### 1.1 Preliminary tests

The experimental work in batch reactors was performed using ethanol as solvent. In order to ensure that there was no interaction between the reactants and the solvent, all final mixtures were analyzed by GC-FID. One of these effluent chromatograms is shown in Fig. S1. As can be verified, there is not a significant signal of any products except for solketal and solketal-ISO (C5 and C6, respectively) and no condensation products involving ethanol were detected. The same can be asserted with acetone, which could be involved in aldolic condensation in an acidic medium. The signals corresponding to the aldolic condensation product (4-hidroxi-4-methyl-pentanone, known as di-acetone-alcohol and 4-methylpent-3-en-2-one, mesityl oxide) can be considered negligible compared to the initial acetone amount.

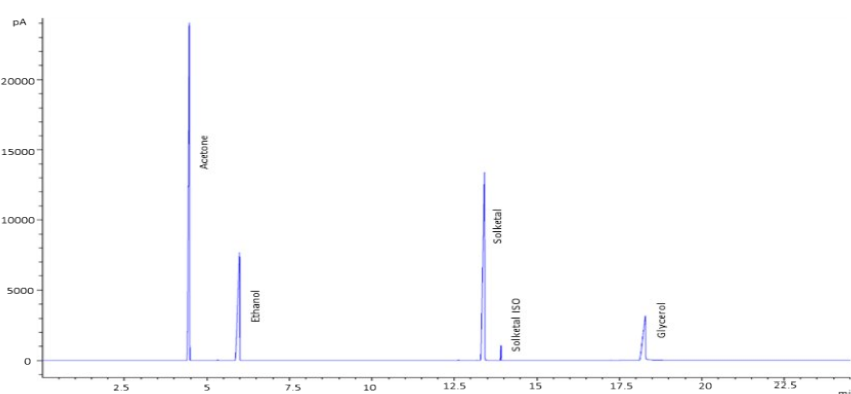

**Fig. S1.** Acetalization effluent chromatogram

Based on these observations, and taking into account that the proportion of dioxolane and dioxane was C5/C6 of 99/1 and there were no significant differences in their characteristics, the conversion ( $X_{\text{Glyc}}$ ) was considered as the formation of both isomers

as the desired product throughout this study. Hence, from the fact that there were no undesirable reactions, selectivity (S) could be considered as 100 %, and therefore conversion (X) was equal to yield (Y).

Table S1A - Experimental data Figure 5

| Test 1:150 rpm |                   | Test 2:250 rpm |                   | Test 3:350 rpm |                   |
|----------------|-------------------|----------------|-------------------|----------------|-------------------|
| t (min)        | X <sub>Glyc</sub> | t (min)        | X <sub>Glyc</sub> | t (min)        | X <sub>Glyc</sub> |
| 0              | 0                 | 0              | 0.00              | 0              | 0                 |
| 2.5            | 0.16              | 2              | 0.19              | 1.5            | 0.17              |
| 5              | 0.28              | 5              | 0.32              | 5              | 0.30              |
| 5.5            | 0.37              | 8              | 0.45              | 6              | 0.40              |
| 7.5            | 0.44              | 10             | 0.52              | 7.5            | 0.47              |
| 10             | 0.50              | 12             | 0.56              | 10             | 0.52              |
| 12.5           | 0.53              | 15             | 0.59              | 12.5           | 0.56              |
| 15             | 0.57              | 18             | 0.61              | 15             | 0.58              |
| 17.5           | 0.59              | 20             | 0.63              | 17.5           | 0.60              |
| 20             | 0.61              | 30             | 0.64              | 20             | 0.61              |
| 22.5           | 0.62              | 45             | 0.65              | 25             | 0.62              |
| 25             | 0.64              |                |                   | 30             | 0.64              |
| 30             | 0.65              |                |                   | 35             | 0.65              |
| 35             | 0.66              |                |                   | 40             | 0.65              |
| 40             | 0.65              |                |                   | 45             | 0.65              |
| 45             | 0.65              |                |                   | 45             | 0.65              |

Table S1B - Experimental data Figure 5

| Test 1: 323 K, 3 wt.% cat, MR <sub>A/G</sub> =2, 150 rpm |                           |                           |                               |                          |
|----------------------------------------------------------|---------------------------|---------------------------|-------------------------------|--------------------------|
| t (min)                                                  | C <sub>Glyc</sub> (mol/L) | C <sub>Acet</sub> (mol/L) | C <sub>solketal</sub> (mol/L) | C <sub>wat</sub> (mol/L) |
| 0                                                        | 3.59                      | 7.18                      | 0.00                          | 0.07                     |
| 2.5                                                      | 3.03                      | 6.62                      | 0.56                          | 0.64                     |
| 5                                                        | 2.59                      | 6.18                      | 1.00                          | 1.07                     |
| 5.5                                                      | 2.26                      | 5.85                      | 1.33                          | 1.40                     |
| 7.5                                                      | 2.01                      | 5.60                      | 1.58                          | 1.65                     |
| 10                                                       | 1.82                      | 5.41                      | 1.77                          | 1.85                     |
| 12.5                                                     | 1.67                      | 5.26                      | 1.92                          | 1.99                     |
| 15                                                       | 1.56                      | 5.15                      | 2.03                          | 2.10                     |
| 17.5                                                     | 1.47                      | 5.06                      | 2.11                          | 2.19                     |
| 20                                                       | 1.41                      | 5.00                      | 2.18                          | 2.25                     |
| 22.5                                                     | 1.36                      | 4.95                      | 2.23                          | 2.30                     |
| 25                                                       | 1.30                      | 4.89                      | 2.28                          | 2.36                     |
| 30                                                       | 1.26                      | 4.85                      | 2.33                          | 2.41                     |
| 35                                                       | 1.23                      | 4.82                      | 2.36                          | 2.43                     |
| 40                                                       | 1.24                      | 4.83                      | 2.34                          | 2.42                     |
| 45                                                       | 1.24                      | 4.83                      | 2.34                          | 2.42                     |

Table S1C - Experimental data Figure 5

| Test 2: 323 K, 3 wt.% cat, $MR_{A/G}=2$ , 250 rpm |                    |                    |                        |                   |
|---------------------------------------------------|--------------------|--------------------|------------------------|-------------------|
| t (min)                                           | $C_{Glyc}$ (mol/L) | $C_{Acet}$ (mol/L) | $C_{solketal}$ (mol/L) | $C_{wat}$ (mol/L) |
| 0                                                 | 3.589              | 7.178              | 0.000                  | 0.074             |
| 2                                                 | 2.907              | 6.496              | 0.682                  | 0.756             |
| 5                                                 | 2.440              | 6.029              | 1.148                  | 1.222             |
| 8                                                 | 1.974              | 5.563              | 1.615                  | 1.689             |
| 10                                                | 1.723              | 5.311              | 1.866                  | 1.940             |
| 12                                                | 1.579              | 5.168              | 2.010                  | 2.084             |
| 15                                                | 1.471              | 5.060              | 2.117                  | 2.191             |
| 18                                                | 1.400              | 4.988              | 2.189                  | 2.263             |
| 20                                                | 1.328              | 4.917              | 2.261                  | 2.335             |
| 30                                                | 1.292              | 4.881              | 2.297                  | 2.371             |
| 45                                                | 1.256              | 4.845              | 2.333                  | 2.407             |

Table S1D - Experimental data Figure 5

| Test 3: 323 K, 3 wt.% cat, $MR_{A/G}=2$ , 350 rpm |                    |                    |                        |                   |
|---------------------------------------------------|--------------------|--------------------|------------------------|-------------------|
| t (min)                                           | $C_{Glyc}$ (mol/L) | $C_{Acet}$ (mol/L) | $C_{solketal}$ (mol/L) | $C_{wat}$ (mol/L) |
| 0                                                 | 3.59               | 7.18               | 0.00                   | 0.07              |
| 1.5                                               | 2.97               | 6.55               | 0.62                   | 0.70              |
| 5                                                 | 2.50               | 6.09               | 1.09                   | 1.17              |
| 6                                                 | 2.15               | 5.74               | 1.44                   | 1.51              |
| 7.5                                               | 1.90               | 5.49               | 1.69                   | 1.76              |
| 10                                                | 1.72               | 5.31               | 1.87                   | 1.94              |
| 12.5                                              | 1.59               | 5.18               | 2.00                   | 2.07              |
| 15                                                | 1.50               | 5.09               | 2.08                   | 2.16              |
| 17.5                                              | 1.44               | 5.03               | 2.15                   | 2.22              |
| 20                                                | 1.39               | 4.98               | 2.19                   | 2.27              |
| 25                                                | 1.36               | 4.95               | 2.23                   | 2.30              |
| 30                                                | 1.29               | 4.88               | 2.30                   | 2.37              |
| 35                                                | 1.25               | 4.84               | 2.34                   | 2.41              |
| 40                                                | 1.24               | 4.83               | 2.35                   | 2.42              |
| 45                                                | 1.24               | 4.83               | 2.34                   | 2.42              |
| 45                                                | 1.24               | 4.83               | 2.34                   | 2.42              |

Table S2A - Experimental data Figure 6

| Test 4: $D_p < 160 \mu\text{m}$ |                   | Test 5: $160 \mu\text{m} < D_p < 500 \mu\text{m}$ |                   | Test 6: $500 \mu\text{m} < D_p < 1\text{mm}$ |                   |
|---------------------------------|-------------------|---------------------------------------------------|-------------------|----------------------------------------------|-------------------|
| t (min)                         | $X_{\text{Glyc}}$ | t (min)                                           | $X_{\text{Glyc}}$ | t (min)                                      | $X_{\text{Glyc}}$ |
| 0                               | 0.00              | 0                                                 | 0                 | 0                                            | 0.00              |
| 2.5                             | 0.15              | 2.5                                               | 0.16              | 1.5                                          | 0.13              |
| 5                               | 0.27              | 5                                                 | 0.28              | 3                                            | 0.24              |
| 6                               | 0.38              | 6                                                 | 0.38              | 6                                            | 0.34              |
| 7.5                             | 0.47              | 7.5                                               | 0.45              | 7.5                                          | 0.42              |
| 10                              | 0.54              | 10                                                | 0.52              | 10                                           | 0.49              |
| 15                              | 0.67              | 15                                                | 0.62              | 15                                           | 0.61              |
| 20                              | 0.74              | 17.5                                              | 0.69              | 20                                           | 0.69              |
| 25                              | 0.77              | 20                                                | 0.74              | 25                                           | 0.75              |
| 30                              | 0.79              | 30                                                | 0.78              | 30                                           | 0.78              |
| 40                              | 0.80              | 40                                                | 0.81              | 35                                           | 0.81              |
| 45                              | 0.81              | 50                                                | 0.83              | 40                                           | 0.83              |
| 50                              | 0.84              | 60                                                | 0.84              | 50                                           | 0.85              |
| 60                              | 0.84              |                                                   |                   | 60                                           | 0.85              |

Table S2B - Experimental data Figure 6

| Test 4: 323 K, 3 wt.% cat, $MR_{A/G}=6$ , $D_p < 160 \mu\text{m}$ |                           |                           |                               |                          |
|-------------------------------------------------------------------|---------------------------|---------------------------|-------------------------------|--------------------------|
| t (min)                                                           | $C_{\text{Glyc}}$ (mol/L) | $C_{\text{Acet}}$ (mol/L) | $C_{\text{solketal}}$ (mol/L) | $C_{\text{wat}}$ (mol/L) |
| 0                                                                 | 1.75                      | 10.47                     | 0.00                          | 0.08                     |
| 2                                                                 | 1.49                      | 10.22                     | 0.26                          | 0.34                     |
| 4                                                                 | 1.27                      | 10.00                     | 0.48                          | 0.56                     |
| 6                                                                 | 1.08                      | 9.81                      | 0.66                          | 0.74                     |
| 8                                                                 | 0.93                      | 9.66                      | 0.82                          | 0.90                     |
| 10                                                                | 0.80                      | 9.53                      | 0.94                          | 1.03                     |
| 15                                                                | 0.58                      | 9.31                      | 1.17                          | 1.25                     |
| 20                                                                | 0.46                      | 9.19                      | 1.29                          | 1.37                     |
| 25                                                                | 0.40                      | 9.13                      | 1.35                          | 1.43                     |
| 30                                                                | 0.37                      | 9.10                      | 1.38                          | 1.46                     |
| 35                                                                | 0.35                      | 9.08                      | 1.39                          | 1.48                     |
| 40                                                                | 0.33                      | 9.06                      | 1.41                          | 1.50                     |
| 50                                                                | 0.28                      | 9.01                      | 1.47                          | 1.55                     |

Table S2C - Experimental data Figure 6

| Test 5: 323 K, 3 wt.% cat, $MR_{A/G}=6$ , $160 \mu\text{m} < D_p < 500 \mu\text{m}$ |                           |                           |                               |                          |
|-------------------------------------------------------------------------------------|---------------------------|---------------------------|-------------------------------|--------------------------|
| t (min)                                                                             | $C_{\text{Glyc}}$ (mol/L) | $C_{\text{Acet}}$ (mol/L) | $C_{\text{solketal}}$ (mol/L) | $C_{\text{wat}}$ (mol/L) |
| 0                                                                                   | 1.15                      | 11.53                     | 0.00                          | 0.08                     |
| 2                                                                                   | 0.97                      | 11.35                     | 0.18                          | 0.26                     |
| 4                                                                                   | 0.83                      | 11.21                     | 0.32                          | 0.41                     |
| 6                                                                                   | 0.72                      | 11.10                     | 0.44                          | 0.52                     |
| 8                                                                                   | 0.63                      | 11.01                     | 0.52                          | 0.61                     |
| 10                                                                                  | 0.56                      | 10.94                     | 0.60                          | 0.68                     |
| 15                                                                                  | 0.44                      | 10.82                     | 0.72                          | 0.80                     |
| 20                                                                                  | 0.36                      | 10.74                     | 0.80                          | 0.88                     |
| 25                                                                                  | 0.30                      | 10.68                     | 0.86                          | 0.94                     |
| 30                                                                                  | 0.25                      | 10.63                     | 0.90                          | 0.99                     |
| 35                                                                                  | 0.22                      | 10.60                     | 0.94                          | 1.02                     |
| 40                                                                                  | 0.19                      | 10.58                     | 0.96                          | 1.04                     |
| 50                                                                                  | 0.28                      | 9.01                      | 1.47                          | 1.55                     |

Table S2D - Experimental data Figure 6

| Test 6: 323 K, 3 wt.% cat, $MR_{A/G}=6$ , $D_p < 1 \text{ mm}$ |                           |                           |                               |                          |
|----------------------------------------------------------------|---------------------------|---------------------------|-------------------------------|--------------------------|
| t (min)                                                        | $C_{\text{Glyc}}$ (mol/L) | $C_{\text{Acet}}$ (mol/L) | $C_{\text{solketal}}$ (mol/L) | $C_{\text{wat}}$ (mol/L) |
| 0                                                              | 1.75                      | 10.47                     | 0.00                          | 0.08                     |
| 2                                                              | 1.51                      | 10.23                     | 0.24                          | 0.32                     |
| 4                                                              | 1.31                      | 10.04                     | 0.44                          | 0.52                     |
| 6                                                              | 1.14                      | 9.87                      | 0.60                          | 0.68                     |
| 8                                                              | 1.01                      | 9.74                      | 0.74                          | 0.82                     |
| 10                                                             | 0.90                      | 9.62                      | 0.85                          | 0.93                     |
| 15                                                             | 0.68                      | 9.41                      | 1.06                          | 1.14                     |
| 20                                                             | 0.53                      | 9.26                      | 1.21                          | 1.29                     |
| 25                                                             | 0.42                      | 9.15                      | 1.32                          | 1.40                     |
| 30                                                             | 0.34                      | 9.07                      | 1.40                          | 1.48                     |
| 35                                                             | 0.30                      | 9.02                      | 1.45                          | 1.53                     |
| 40                                                             | 0.28                      | 9.01                      | 1.47                          | 1.55                     |
| 50                                                             | 0.28                      | 9.01                      | 1.47                          | 1.55                     |

Table S3A - Experimental data Figure 7

| Test 9: RM10 |                   | Test 8: RM6 |                   | Test 7:RM2 |                   |
|--------------|-------------------|-------------|-------------------|------------|-------------------|
| t (min)      | X <sub>Glyc</sub> | t (min)     | X <sub>Glyc</sub> | t (min)    | X <sub>Glyc</sub> |
| 0            | 0.00              | 0           | 0.00              | 0          | 0.00              |
| 4            | 0.08              | 8           | 0.19              | 4          | 0.12              |
| 8            | 0.15              | 15          | 0.34              | 12         | 0.22              |
| 15           | 0.21              | 30          | 0.45              | 15         | 0.30              |
| 25           | 0.27              | 45          | 0.54              | 22         | 0.37              |
| 20           | 0.33              | 50          | 0.60              | 25         | 0.42              |
| 35           | 0.38              | 60          | 0.65              | 30         | 0.47              |
| 30           | 0.42              | 75          | 0.69              | 35         | 0.50              |
| 40           | 0.46              | 90          | 0.72              | 40         | 0.53              |
| 50           | 0.50              | 95          | 0.76              | 45         | 0.56              |
| 45           | 0.53              | 120         | 0.78              | 50         | 0.58              |
| 55           | 0.56              | 130         | 0.81              | 60         | 0.63              |
| 60           | 0.59              | 140         | 0.82              | 90         | 0.65              |
| 80           | 0.66              | 150         | 0.84              | 110        | 0.67              |
| 90           | 0.71              | 180         | 0.86              | 130        | 0.68              |
| 120          | 0.78              | 240         | 0.87              | 150        | 0.69              |
| 180          | 0.86              |             |                   | 170        | 0.69              |
| 240          | 0.90              |             |                   | 190        | 0.70              |
| 270          | 0.91              |             |                   | 200        | 0.70              |
| 320          | 0.91              |             |                   |            |                   |

Table S3B - Experimental data Figure 7

| Test 9: 298 K, 3 wt.% cat, MR <sub>A/G</sub> =10 |                           |                           |                               |                          |
|--------------------------------------------------|---------------------------|---------------------------|-------------------------------|--------------------------|
| t (min)                                          | C <sub>Glyc</sub> (mol/L) | C <sub>Acet</sub> (mol/L) | C <sub>solketal</sub> (mol/L) | C <sub>wat</sub> (mol/L) |
| 0                                                | 1.15                      | 11.53                     | 0.00                          | 0.08                     |
| 5                                                | 1.06                      | 11.45                     | 0.09                          | 0.17                     |
| 10                                               | 0.98                      | 11.36                     | 0.17                          | 0.25                     |
| 15                                               | 0.91                      | 11.29                     | 0.24                          | 0.33                     |
| 20                                               | 0.84                      | 11.22                     | 0.31                          | 0.40                     |
| 25                                               | 0.78                      | 11.16                     | 0.38                          | 0.46                     |
| 30                                               | 0.72                      | 11.10                     | 0.43                          | 0.52                     |
| 35                                               | 0.67                      | 11.05                     | 0.48                          | 0.57                     |
| 40                                               | 0.62                      | 11.00                     | 0.53                          | 0.62                     |
| 45                                               | 0.58                      | 10.96                     | 0.58                          | 0.66                     |
| 50                                               | 0.54                      | 10.92                     | 0.61                          | 0.70                     |
| 55                                               | 0.50                      | 10.88                     | 0.65                          | 0.73                     |
| 60                                               | 0.47                      | 10.85                     | 0.68                          | 0.77                     |
| 75                                               | 0.39                      | 10.77                     | 0.76                          | 0.85                     |
| 90                                               | 0.33                      | 10.71                     | 0.82                          | 0.91                     |
| 120                                              | 0.25                      | 10.63                     | 0.90                          | 0.99                     |
| 180                                              | 0.16                      | 10.54                     | 0.99                          | 1.08                     |
| 240                                              | 0.12                      | 10.50                     | 1.04                          | 1.12                     |
| 270                                              | 0.11                      | 10.49                     | 1.05                          | 1.13                     |
| 320                                              | 0.11                      | 10.49                     | 1.05                          | 1.13                     |

Table S3C - Experimental data Figure 7

| Test 8: 298 K, 3 wt.% cat, $MR_{A/G}=6$ |                    |                    |                        |                   |
|-----------------------------------------|--------------------|--------------------|------------------------|-------------------|
| t (min)                                 | $C_{Glyc}$ (mol/L) | $C_{Acet}$ (mol/L) | $C_{solketal}$ (mol/L) | $C_{wat}$ (mol/L) |
| 0                                       | 1.75               | 10.47              | 0.00                   | 0.08              |
| 8                                       | 1.41               | 10.14              | 0.34                   | 0.42              |
| 15                                      | 1.15               | 9.88               | 0.59                   | 0.68              |
| 30                                      | 0.96               | 9.68               | 0.79                   | 0.87              |
| 45                                      | 0.81               | 9.54               | 0.94                   | 1.02              |
| 50                                      | 0.70               | 9.42               | 1.05                   | 1.13              |
| 60                                      | 0.61               | 9.34               | 1.14                   | 1.22              |
| 75                                      | 0.54               | 9.27               | 1.20                   | 1.28              |
| 90                                      | 0.49               | 9.22               | 1.25                   | 1.33              |
| 95                                      | 0.42               | 9.15               | 1.33                   | 1.41              |
| 120                                     | 0.39               | 9.11               | 1.36                   | 1.44              |
| 130                                     | 0.33               | 9.06               | 1.41                   | 1.49              |
| 140                                     | 0.31               | 9.04               | 1.43                   | 1.51              |
| 150                                     | 0.29               | 9.02               | 1.45                   | 1.53              |
| 180                                     | 0.28               | 9.01               | 1.47                   | 2.55              |
| 240                                     | 0.26               | 8.99               | 1.48                   | 1.56              |

Table S3D - Experimental data Figure 7

| Test 7: 298 K, 3 wt.% cat, $MR_{A/G}=2$ |                    |                    |                        |                   |
|-----------------------------------------|--------------------|--------------------|------------------------|-------------------|
| t (min)                                 | $C_{Glyc}$ (mol/L) | $C_{Acet}$ (mol/L) | $C_{solketal}$ (mol/L) | $C_{wat}$ (mol/L) |
| 0                                       | 3.59               | 7.18               | 0.00                   | 0.07              |
| 4                                       | 3.16               | 6.75               | 0.43                   | 0.51              |
| 12                                      | 2.80               | 6.39               | 0.79                   | 0.86              |
| 15                                      | 2.51               | 6.09               | 1.08                   | 1.16              |
| 22                                      | 2.26               | 5.85               | 1.32                   | 1.40              |
| 25                                      | 2.07               | 5.66               | 1.52                   | 1.60              |
| 30                                      | 1.91               | 5.50               | 1.68                   | 1.76              |
| 35                                      | 1.78               | 5.37               | 1.81                   | 1.89              |
| 40                                      | 1.67               | 5.26               | 1.92                   | 1.99              |
| 45                                      | 1.59               | 5.18               | 2.00                   | 2.08              |
| 50                                      | 1.52               | 5.11               | 2.07                   | 2.15              |
| 60                                      | 1.35               | 4.93               | 2.24                   | 2.32              |
| 90                                      | 1.25               | 4.84               | 2.34                   | 2.41              |
| 110                                     | 1.19               | 4.78               | 2.40                   | 2.47              |
| 130                                     | 1.15               | 4.74               | 2.44                   | 2.51              |
| 150                                     | 1.12               | 4.71               | 2.47                   | 2.54              |
| 170                                     | 1.10               | 4.68               | 2.49                   | 2.57              |
| 190                                     | 1.08               | 4.66               | 2.51                   | 2.59              |
| 200                                     | 1.08               | 4.67               | 2.51                   | 2.59              |

Table S4A - Experimental data Figure 8

| Test 10: 298 K |                   | Test 11: 308 K |                   | Test 12: 323 K |                   |
|----------------|-------------------|----------------|-------------------|----------------|-------------------|
| t (min)        | X <sub>Glyc</sub> | t (min)        | X <sub>Glyc</sub> | t (min)        | X <sub>Glyc</sub> |
| 0              | 0.00              | 0              | 0.00              | 0              | 0.00              |
| 10             | 0.20              | 10             | 0.30              | 15             | 0.46              |
| 30             | 0.35              | 30             | 0.50              | 20             | 0.70              |
| 40             | 0.45              | 40             | 0.63              | 35             | 0.80              |
| 45             | 0.55              | 60             | 0.70              | 60             | 0.86              |
| 60             | 0.63              | 75             | 0.82              | 75             | 0.89              |
| 75             | 0.68              | 90             | 0.86              | 90             | 0.90              |
| 90             | 0.72              | 120            | 0.89              | 120            | 0.90              |
| 100            | 0.75              | 150            | 0.90              | 180            | 0.90              |
| 120            | 0.81              | 180            | 0.91              | 240            | 0.90              |
| 150            | 0.85              | 240            | 0.91              | 300            | 0.90              |
| 160            | 0.87              | 300            | 0.91              |                |                   |
| 180            | 0.89              |                |                   |                |                   |
| 240            | 0.91              |                |                   |                |                   |
| 300            | 0.91              |                |                   |                |                   |

Table S4B - Experimental data Figure 8

| Test 10: 298 K, 3 wt.% cat, MR <sub>A/G</sub> =10 |                           |                           |                               |                          |
|---------------------------------------------------|---------------------------|---------------------------|-------------------------------|--------------------------|
| t (min)                                           | C <sub>Glyc</sub> (mol/L) | C <sub>Acet</sub> (mol/L) | C <sub>solketal</sub> (mol/L) | C <sub>wat</sub> (mol/L) |
| 0                                                 | 0.91                      | 9.08                      | 0.00                          | 0.07                     |
| 10                                                | 0.73                      | 8.90                      | 0.18                          | 0.26                     |
| 30                                                | 0.59                      | 8.77                      | 0.32                          | 0.39                     |
| 40                                                | 0.50                      | 8.68                      | 0.41                          | 0.48                     |
| 45                                                | 0.41                      | 8.59                      | 0.50                          | 0.57                     |
| 60                                                | 0.34                      | 8.51                      | 0.57                          | 0.65                     |
| 75                                                | 0.29                      | 8.47                      | 0.62                          | 0.69                     |
| 90                                                | 0.25                      | 8.43                      | 0.65                          | 0.73                     |
| 100                                               | 0.23                      | 8.40                      | 0.68                          | 0.76                     |
| 120                                               | 0.17                      | 8.35                      | 0.74                          | 0.81                     |
| 150                                               | 0.14                      | 8.31                      | 0.77                          | 0.85                     |
| 160                                               | 0.12                      | 8.29                      | 0.79                          | 0.87                     |
| 180                                               | 0.10                      | 8.28                      | 0.81                          | 0.88                     |
| 240                                               | 0.09                      | 8.26                      | 0.82                          | 0.90                     |
| 300                                               | 0.09                      | 8.26                      | 0.82                          | 0.90                     |



Table S4C - Experimental data Figure 8

| Test 11: 308 K, 3 wt.% cat, $MR_{A/G}=10$ |                    |                    |                        |                   |
|-------------------------------------------|--------------------|--------------------|------------------------|-------------------|
| t (min)                                   | $C_{Glyc}$ (mol/L) | $C_{Acet}$ (mol/L) | $C_{solketal}$ (mol/L) | $C_{wat}$ (mol/L) |
| 0                                         | 0.91               | 9.08               | 0.00                   | 0.07              |
| 10                                        | 0.64               | 8.81               | 0.27                   | 0.35              |
| 30                                        | 0.45               | 8.63               | 0.45                   | 0.53              |
| 40                                        | 0.34               | 8.52               | 0.57                   | 0.64              |
| 60                                        | 0.27               | 8.45               | 0.64                   | 0.71              |
| 75                                        | 0.16               | 8.34               | 0.74                   | 0.82              |
| 90                                        | 0.13               | 8.30               | 0.78                   | 0.86              |
| 120                                       | 0.10               | 8.28               | 0.81                   | 0.88              |
| 150                                       | 0.09               | 8.27               | 0.82                   | 0.89              |
| 180                                       | 0.08               | 8.26               | 0.83                   | 0.90              |
| 240                                       | 0.08               | 8.26               | 0.83                   | 0.90              |
| 300                                       | 0.08               | 8.26               | 0.83                   | 0.90              |

Table S4D - Experimental data Figure 8

| Test 12: 323 K, 3 wt.% cat, $MR_{A/G}=10$ |                    |                    |                        |                   |
|-------------------------------------------|--------------------|--------------------|------------------------|-------------------|
| t (min)                                   | $C_{Glyc}$ (mol/L) | $C_{Acet}$ (mol/L) | $C_{solketal}$ (mol/L) | $C_{wat}$ (mol/L) |
| 0                                         | 0.91               | 9.08               | 0.00                   | 0.07              |
| 15                                        | 0.49               | 8.67               | 0.42                   | 0.49              |
| 20                                        | 0.27               | 8.45               | 0.64                   | 0.71              |
| 35                                        | 0.18               | 8.36               | 0.73                   | 0.80              |
| 60                                        | 0.13               | 8.30               | 0.78                   | 0.86              |
| 75                                        | 0.10               | 8.28               | 0.81                   | 0.88              |
| 90                                        | 0.09               | 8.27               | 0.82                   | 0.89              |
| 120                                       | 0.09               | 8.27               | 0.82                   | 0.89              |
| 180                                       | 0.09               | 8.27               | 0.82                   | 0.89              |
| 240                                       | 0.09               | 8.27               | 0.82                   | 0.89              |
| 300                                       | 0.09               | 8.27               | 0.82                   | 0.89              |

Table S5A - Experimental data Figure 9

| Test 14: 5% |                   | Test 2: 3% |                   | Test 13: 1% |                   |
|-------------|-------------------|------------|-------------------|-------------|-------------------|
| t (min)     | X <sub>Glyc</sub> | t (min)    | X <sub>Glyc</sub> | t (min)     | X <sub>Glyc</sub> |
| 0           | 0.00              | 0          | 0.00              | 0           | 0.00              |
| 2           | 0.31              | 2          | 0.21              | 4           | 0.15              |
| 5           | 0.48              | 4          | 0.35              | 8           | 0.27              |
| 7           | 0.56              | 8          | 0.45              | 15          | 0.35              |
| 10          | 0.60              | 10         | 0.52              | 20          | 0.43              |
| 15          | 0.64              | 12         | 0.56              | 30          | 0.47              |
| 20          | 0.65              | 15         | 0.59              | 25          | 0.52              |
| 30          | 0.65              | 18         | 0.61              | 35          | 0.55              |
| 45          | 0.65              | 20         | 0.63              | 40          | 0.57              |
|             |                   | 30         | 0.64              | 45          | 0.59              |
|             |                   | 45         | 0.65              | 55          | 0.60              |
|             |                   |            |                   | 60          | 0.62              |
|             |                   |            |                   | 70          | 0.62              |
|             |                   |            |                   | 90          | 0.65              |
|             |                   |            |                   | 120         | 0.65              |

Table S5B - Experimental data Figure 9

| Test 13: 323 K, 5 wt.% cat, MR <sub>A/G</sub> =2 |                           |                           |                               |                          |
|--------------------------------------------------|---------------------------|---------------------------|-------------------------------|--------------------------|
| t (min)                                          | C <sub>Glyc</sub> (mol/L) | C <sub>Acet</sub> (mol/L) | C <sub>solketal</sub> (mol/L) | C <sub>wat</sub> (mol/L) |
| 0                                                | 3.59                      | 7.18                      | 0.00                          | 0.07                     |
| 2                                                | 2.48                      | 6.07                      | 1.11                          | 1.19                     |
| 5                                                | 1.87                      | 5.46                      | 1.72                          | 1.80                     |
| 7                                                | 1.58                      | 5.17                      | 2.01                          | 2.08                     |
| 10                                               | 1.44                      | 5.02                      | 2.15                          | 2.23                     |
| 15                                               | 1.29                      | 4.88                      | 2.30                          | 2.37                     |
| 20                                               | 1.26                      | 4.84                      | 2.33                          | 2.41                     |
| 30                                               | 1.26                      | 4.84                      | 2.33                          | 2.41                     |
| 45                                               | 1.26                      | 4.84                      | 2.33                          | 2.41                     |

Table S5C - Experimental data Figure 9

| Test 14: 323 K, 1 wt.% cat, MR <sub>A/G</sub> =2 |                           |                           |                               |                          |
|--------------------------------------------------|---------------------------|---------------------------|-------------------------------|--------------------------|
| t (min)                                          | C <sub>Glyc</sub> (mol/L) | C <sub>Acet</sub> (mol/L) | C <sub>solketal</sub> (mol/L) | C <sub>wat</sub> (mol/L) |
| 0                                                | 3.589                     | 7.178                     | 0.000                         | 0.074                    |
| 2                                                | 2.835                     | 6.424                     | 0.754                         | 0.828                    |
| 4                                                | 2.333                     | 5.922                     | 1.256                         | 1.330                    |
| 8                                                | 1.974                     | 5.563                     | 1.615                         | 1.689                    |
| 10                                               | 1.723                     | 5.311                     | 1.866                         | 1.940                    |
| 12                                               | 1.579                     | 5.168                     | 2.010                         | 2.084                    |
| 15                                               | 1.471                     | 5.060                     | 2.117                         | 2.191                    |
| 18                                               | 1.400                     | 4.988                     | 2.189                         | 2.263                    |
| 20                                               | 1.328                     | 4.917                     | 2.261                         | 2.335                    |
| 30                                               | 1.292                     | 4.881                     | 2.297                         | 2.371                    |
| 45                                               | 1.256                     | 4.845                     | 2.333                         | 2.407                    |

Table S6 - Experimental / estimated data Figure 10

| 323 K    |          | 308 K    |          | 298 K    |          |
|----------|----------|----------|----------|----------|----------|
| dXdt_exp | dXdt_est | dXdt_exp | dXdt_est | dXdt_exp | dXdt_est |
| 0.049    | 0.051    | 0.028    | 0.028    | 0.017    | 0.017    |
| 0.043    | 0.045    | 0.024    | 0.024    | 0.014    | 0.014    |
| 0.038    | 0.039    | 0.021    | 0.021    | 0.012    | 0.012    |
| 0.034    | 0.034    | 0.018    | 0.018    | 0.010    | 0.010    |
| 0.030    | 0.029    | 0.015    | 0.015    | 0.008    | 0.008    |
| 0.026    | 0.025    | 0.013    | 0.013    | 0.006    | 0.006    |
| 0.023    | 0.022    | 0.011    | 0.011    | 0.005    | 0.005    |
| 0.020    | 0.019    | 0.009    | 0.009    | 0.004    | 0.004    |
| 0.017    | 0.016    | 0.008    | 0.008    | 0.004    | 0.004    |
| 0.015    | 0.014    | 0.007    | 0.007    | 0.003    | 0.003    |
| 0.013    | 0.012    | 0.006    | 0.006    | 0.003    | 0.003    |
| 0.011    | 0.010    | 0.004    | 0.005    | 0.002    | 0.002    |
| 0.010    | 0.009    | 0.003    | 0.004    | 0.002    | 0.002    |
| 0.008    | 0.007    | 0.002    | 0.003    | 0.001    | 0.001    |
| 0.007    | 0.006    | 0.002    | 0.002    | 0.001    | 0.001    |
| 0.006    | 0.005    | 0.002    | 0.001    | 0.001    | 0.001    |
| 0.005    | 0.005    | 0.001    | 0.001    |          |          |
| 0.004    | 0.003    | 0.001    | 0.000    |          |          |
| 0.003    | 0.002    | 0.000    | 0.000    |          |          |
| 0.002    | 0.002    |          |          |          |          |
| 0.001    | 0.001    |          |          |          |          |
| 0.001    | 0.000    |          |          |          |          |
| 0.000    | 0.000    |          |          |          |          |

Table S7 - Experimental/estimated data Figure 12

| dXdt_exp | dXdt_est | dXdt_exp | dXdt_est | dXdt_exp | dXdt_est |
|----------|----------|----------|----------|----------|----------|
| 0.022    | 0.021    | 0.068    | 0.061    | 0.030    | 0.035    |
| 0.017    | 0.016    | 0.058    | 0.051    | 0.021    | 0.021    |
| 0.013    | 0.013    | 0.049    | 0.043    | 0.015    | 0.015    |
| 0.010    | 0.010    | 0.040    | 0.036    | 0.010    | 0.011    |
| 0.007    | 0.008    | 0.033    | 0.029    | 0.008    | 0.009    |
| 0.006    | 0.006    | 0.019    | 0.018    | 0.006    | 0.007    |
| 0.004    | 0.005    | 0.010    | 0.011    | 0.005    | 0.005    |
| 0.003    | 0.004    | 0.005    | 0.007    | 0.003    | 0.002    |
| 0.003    | 0.004    | 0.002    | 0.004    | 0.002    | 0.000    |
| 0.002    | 0.003    | 0.002    | 0.003    | 0.000    | 0.000    |
| 0.002    | 0.003    | 0.003    | 0.002    | 0.000    | 0.000    |
| 0.002    | 0.002    | 0.000    | 0.000    | 0.089    | 0.101    |
| 0.002    | 0.002    | 0.026    | 0.029    | 0.069    | 0.073    |
| 0.001    | 0.002    | 0.022    | 0.024    | 0.053    | 0.053    |
| 0.001    | 0.001    | 0.018    | 0.020    | 0.040    | 0.038    |
| 0.001    | 0.001    | 0.015    | 0.016    | 0.031    | 0.028    |
| 0.001    | 0.001    | 0.012    | 0.013    | 0.023    | 0.021    |
| 0.001    | 0.001    | 0.010    | 0.011    | 0.018    | 0.016    |
| 0.001    | 0.000    | 0.008    | 0.009    | 0.014    | 0.012    |
| 0.000    | 0.000    | 0.007    | 0.008    | 0.010    | 0.006    |
| 0.000    | 0.000    | 0.005    | 0.007    | 0.008    | 0.006    |
| 0.000    | 0.000    | 0.004    | 0.006    | 0.006    | 0.004    |
| 0.000    | 0.000    | 0.003    | 0.005    | 0.003    | 0.002    |
| 0.076    | 0.072    | 0.002    | 0.003    | 0.002    | 0.000    |
| 0.062    | 0.060    | 0.001    | 0.002    | 0.001    | 0.000    |
| 0.052    | 0.051    | 0.001    | 0.001    |          |          |
| 0.043    | 0.043    | 0.000    | 0.001    |          |          |
| 0.035    | 0.036    | 0.000    | 0.000    |          |          |
| 0.030    | 0.030    | 0.000    | 0.000    |          |          |
| 0.020    | 0.018    | 0.000    | 0.000    |          |          |
| 0.015    | 0.013    | 0.000    | 0.000    |          |          |
| 0.011    | 0.008    | 0.034    | 0.034    |          |          |
| 0.008    | 0.004    | 0.028    | 0.027    |          |          |
| 0.004    | 0.001    | 0.023    | 0.022    |          |          |
| 0.000    | 0.000    | 0.018    | 0.018    |          |          |
| 0.000    | 0.000    | 0.015    | 0.015    |          |          |
| 0.088    | 0.072    | 0.012    | 0.012    |          |          |
| 0.070    | 0.061    | 0.010    | 0.010    |          |          |
| 0.055    | 0.051    | 0.008    | 0.008    |          |          |
| 0.043    | 0.043    | 0.006    | 0.007    |          |          |
| 0.034    | 0.036    | 0.005    | 0.005    |          |          |
| 0.027    | 0.031    | 0.000    | 0.004    |          |          |
| 0.017    | 0.020    | 0.003    | 0.003    |          |          |
| 0.012    | 0.013    | 0.003    | 0.003    |          |          |
| 0.009    | 0.008    | 0.002    | 0.002    |          |          |
| 0.007    | 0.005    | 0.001    | 0.001    |          |          |
| 0.005    | 0.003    | 0.000    | 0.001    |          |          |
| 0.003    | 0.001    | 0.000    | 0.001    |          |          |
| 0.000    | 0.000    | 0.099    | 0.101    |          |          |
| 0.080    | 0.072    | 0.075    | 0.074    |          |          |

Table S8 – Experimental/estimated data Figure 14

| 313 K                 |                       | 323 K                 |                       | 333 K                 |                       |
|-----------------------|-----------------------|-----------------------|-----------------------|-----------------------|-----------------------|
| X <sub>Glyc_exp</sub> | X <sub>Glyc_est</sub> | X <sub>Glyc_exp</sub> | X <sub>Glyc_est</sub> | X <sub>Glyc_exp</sub> | X <sub>Glyc_est</sub> |
| 0.56                  | 0.5                   | 0.73                  | 0.75                  | 0.85                  | 0.84                  |
| 0.57                  | 0.5                   | 0.78                  | 0.75                  | 0.77                  | 0.77                  |
| 0.68                  | 0.64                  | 0.74                  | 0.77                  | 0.78                  | 0.81                  |
| 0.68                  | 0.66                  | 0.66                  | 0.66                  | 0.88                  | 0.85                  |
| 0.69                  | 0.59                  | 0.78                  | 0.78                  | 0.84                  | 0.85                  |
|                       |                       | 0.52                  | 0.56                  | 0.86                  | 0.85                  |
|                       |                       | 0.62                  | 0.66                  | 0.85                  | 0.91                  |
|                       |                       | 0.77                  | 0.78                  | 0.86                  | 0.86                  |
|                       |                       | 0.61                  | 0.66                  |                       |                       |
|                       |                       | 0.9                   | 0.86                  |                       |                       |
|                       |                       | 0.82                  | 0.84                  |                       |                       |
|                       |                       | 0.87                  | 0.85                  |                       |                       |
|                       |                       | 0.86                  | 0.85                  |                       |                       |
|                       |                       | 0.87                  | 0.89                  |                       |                       |
|                       |                       | 0.91                  | 0.89                  |                       |                       |
|                       |                       | 0.83                  | 0.85                  |                       |                       |

### Estimation of the confidence intervals:

After estimating the kinetic and thermodynamic parameters ( $ps_{est}$ ) as has been previously described, the results obtained were analyzed in statistical terms, determining the uncertainty of these parameters based on confidence intervals, following the method described by Portillo et al [1]. These intervals provide a range of values where the value of the parameters ( $ps$ ) is found with a probability of  $1-\alpha$  (confidence level). The confidence intervals are estimated according to:

$$ps = ps_{est} \pm t_{\alpha/2, Ndf} \cdot \sqrt{Tr(V_{ps})}$$

Where is the vector of the estimated parameters  $t_{\alpha/2, Ndf}$  is the value of the student  $t$  distribution with  $Ndf$  degrees of freedom and  $V_{ps}$  is the variance-covariance matrix of the parameters.

Close to the minimum of the objective function, by Taylor series approximation to the quadratic term, the objective function is described in the equation:

$$\Phi(ps) \approx \Phi(ps_{est}) + \nabla \Phi_{ps=ps_{est}} (ps - ps_{est})^T + \frac{1}{2} (ps - ps_{est})^T \cdot H_{ps=ps_{est}} (ps - ps_{est})$$

With

$$\nabla \Phi = \frac{\partial \Phi}{\partial ps_k} \quad \text{and} \quad H = \frac{\partial^2 \Phi}{\partial ps_k \partial ps_l}$$

Where  $\nabla \Phi$  is the objective function gradient, and  $H$  its hessian matrix. At the minimum or optimum point, the gradient of the objective function is zero:

$$\nabla \Phi_{ps=ps_{est}} = 0$$

By assuming that the errors estimation of these parameters follow a normal distribution,  $V_{ps}$  has been estimated from the hessian matrix evaluated at the optimum point since the inverse of hessian at the optimum point is a good estimator of the covariance matrix of the estimated parameters.

$$H_{ps} = 2 \cdot V_{ps}^{-1}$$

This relation is intuitive since the sensitivity of the objective function in the optimal versus quadratic deviations in the parameters is given by the Hessian matrix

$$\Phi(ps) - \Phi(ps_{est}) \approx \frac{1}{2} (ps - ps_{est})^T \cdot H_{ps=ps_{est}} (ps - ps_{est})$$

For the determination of the covariance matrix from the Hessian, it can be previously defined the Jacobian matrix J of the residuals as:

$$J(ps) = \begin{bmatrix} J_1 \\ J_2 \\ \dots \\ J_N \end{bmatrix}_{(N \times C) \times p}$$

With

$$J_j = \begin{bmatrix} \frac{\partial r_{1j}}{\partial ps_1} & \dots & \frac{\partial r_{1j}}{\partial ps_p} \\ \dots & \dots & \dots \\ \frac{\partial r_{cj}}{\partial ps_1} & \dots & \frac{\partial r_{cj}}{\partial ps_p} \end{bmatrix}$$

It can be demonstrated that  $\nabla \Phi = 2 \cdot J^T \cdot r$ , from :

$$\nabla \Phi = \frac{\partial \Phi}{\partial ps} = \frac{\partial \sum_{i=1}^C \sum_{j=1}^N r_{ij}^2}{\partial ps} = 2 \cdot J^T \cdot \frac{\partial r_{ij}}{\partial ps} = 2 \cdot J^T \cdot r$$

With

$$r = \begin{bmatrix} r_1 \\ r_2 \\ \dots \\ r_{c_j} \end{bmatrix}$$

Where

$$r_j = \begin{bmatrix} r_{1j} \\ \dots \\ r_{cj} \end{bmatrix}$$

The Hessian matrix can be expressed in terms of the Jacobian matrix through the equation:

$$H(ps) = \frac{\partial^2 ps}{\partial ps_k \partial ps_l} = \frac{\partial^2}{\partial ps_k \partial ps_l} \sum_{i=1}^C \sum_{j=1}^N (r_{ij})^2 = 2 \cdot \sum_{i=1}^C \sum_{j=1}^N \frac{\partial r_{ij}}{\partial ps_k} \frac{\partial r_{ij}}{\partial ps_l} + 2 \cdot \sum_{i=1}^C \sum_{j=1}^N r_{ij} \frac{\partial^2 r_{ij}}{\partial ps_k \partial ps_l};$$

$$H(ps) = 2 \cdot J^T \cdot J + 2 \cdot \sum_{i=1}^C \sum_{j=1}^N r_{ij} \frac{\partial^2 r_{ij}}{\partial ps_k \partial ps_l};$$

From this expression, it can be verified that the second term of the Hessian is multiplied by the residuals ( $r_{ij}$ ). At the optimal point, the values of the residuals must be not-significant, so this second term of Eq. 6.16 can be neglected, giving rise to which is known as the Gauss-Newton approximation of the Hessian:

$$H(ps_{est}) = 2 \cdot J^T \cdot J$$

Therefore, the covariance matrix has been calculated using the equation

$$V_{ps}^{-1} = \frac{1}{2} \cdot H(ps_{est}) \approx J^T \cdot J \rightarrow V_{ps} \approx (J^T \cdot J)^{-1}$$

According to this, it is not necessary to determine derivatives of second order for the calculation of the covariance matrix.
